# Supplementary material for: Systematic comparative validation of self-report measures of sedentary time against an objective measure of postural sitting (activPAL)
Source: PubMed Central journal article supplement (PMC5828279; doi:10.1186/s12966-018-0652-x), 2018-02-26
Supplement: 12966_2018_652_MOESM2_ESM.pdf [file 12966_2018_652_MOESM2_ESM.pdf]

Systematic comparative validation of self-reported measures of sedentary time using the TASTT taxonomy.

*Additional file 2.*  
*Bland and Altman plots*

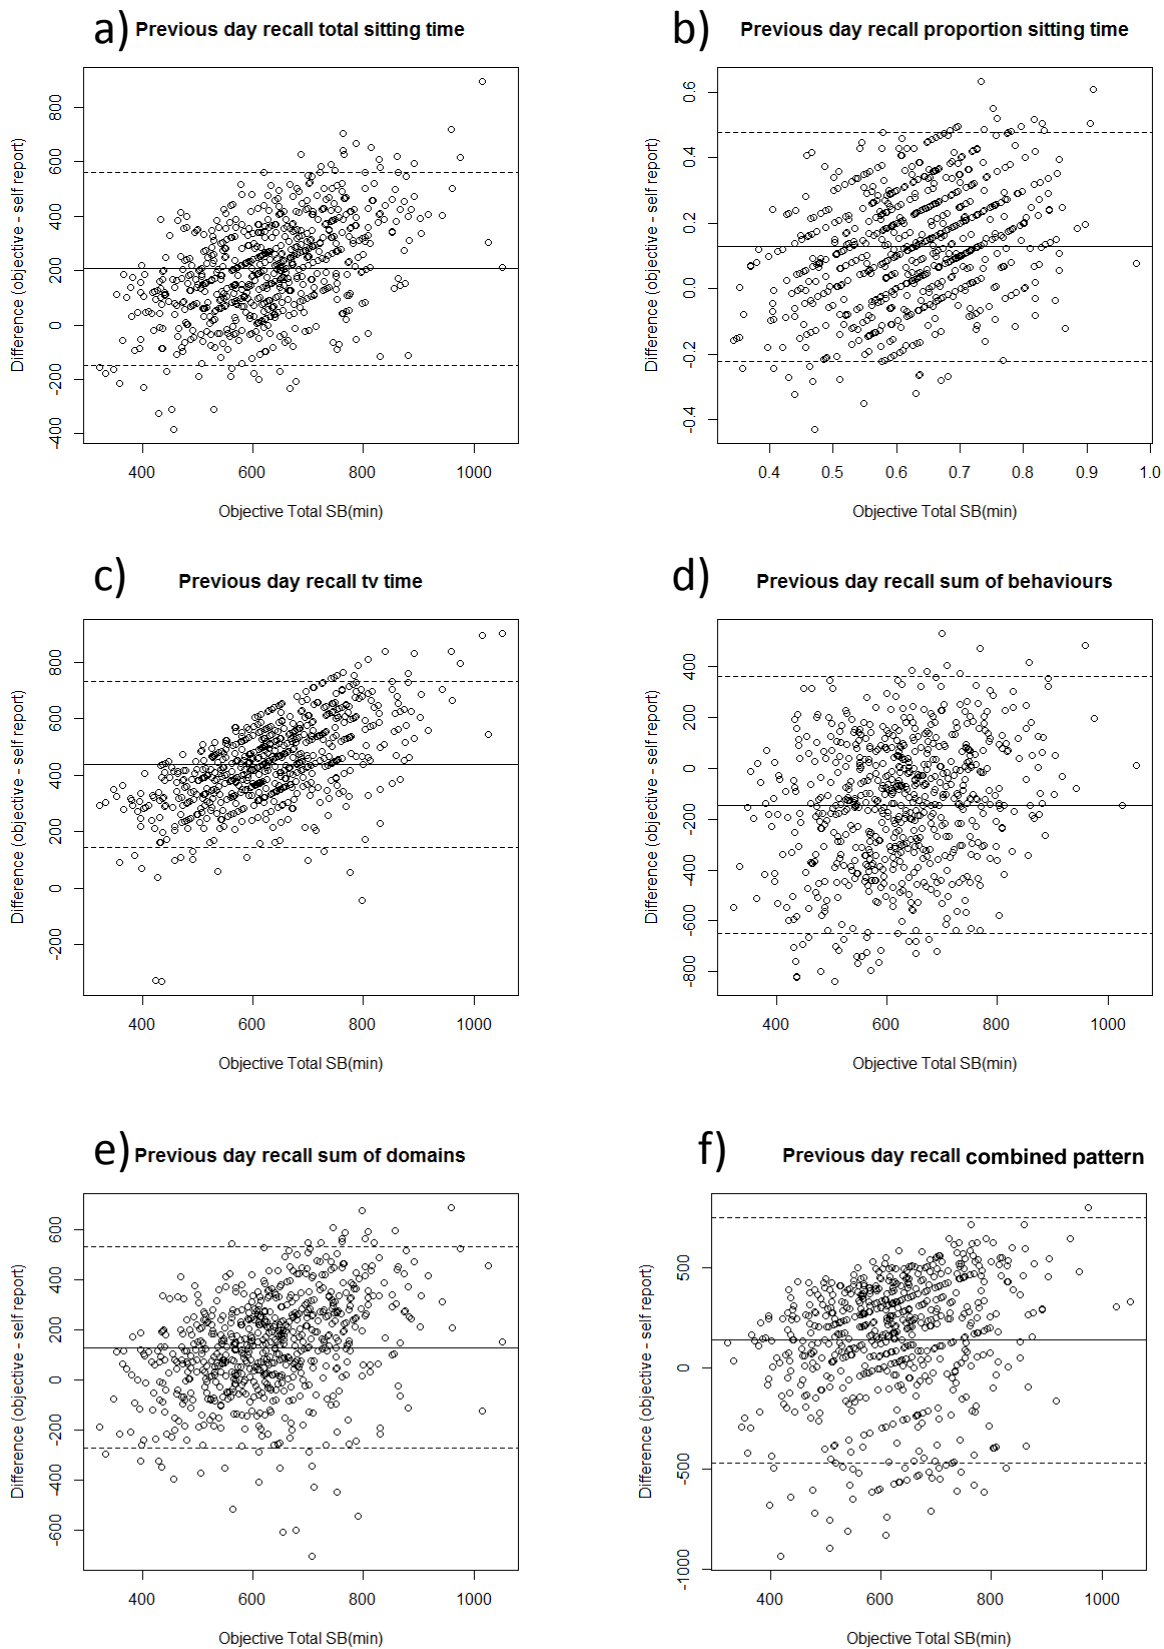

Figure S1: Bland and Altman plots for previous day recall self-reported tools of sedentary time

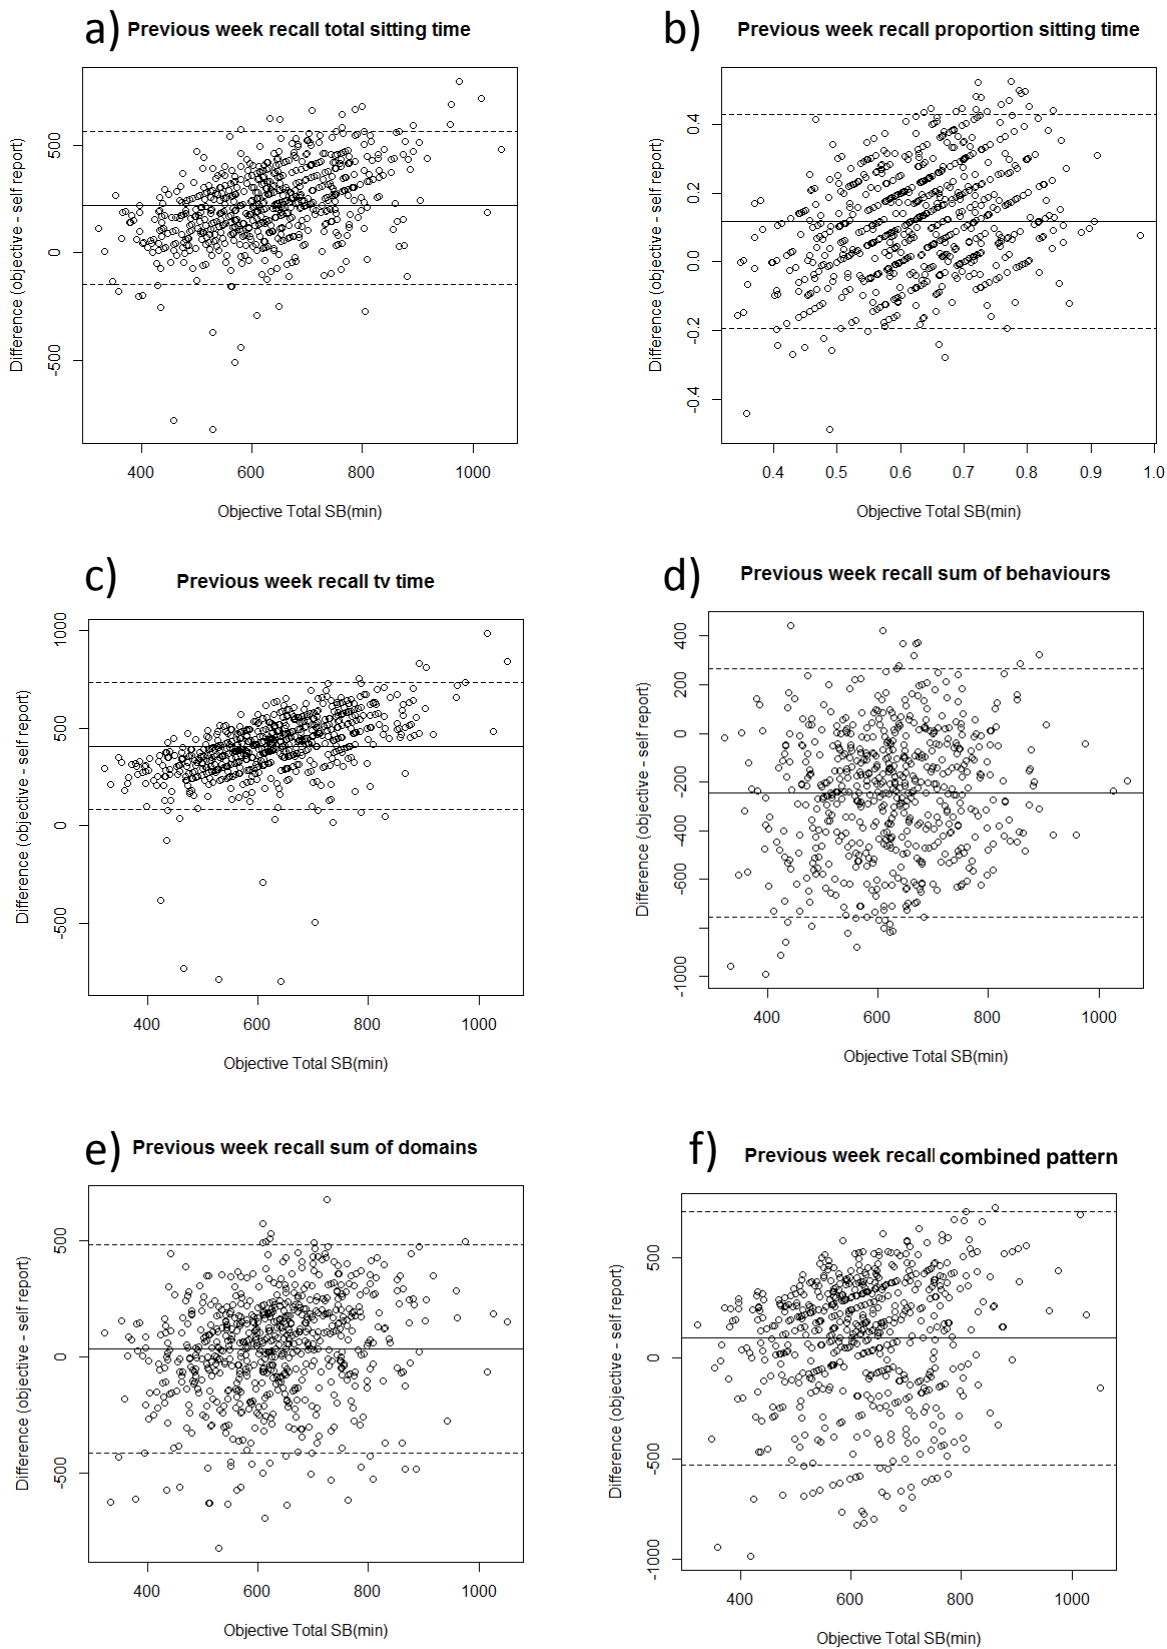

Figure S2: Bland and Altman plots for previous week recall self-reported tools of sedentary time

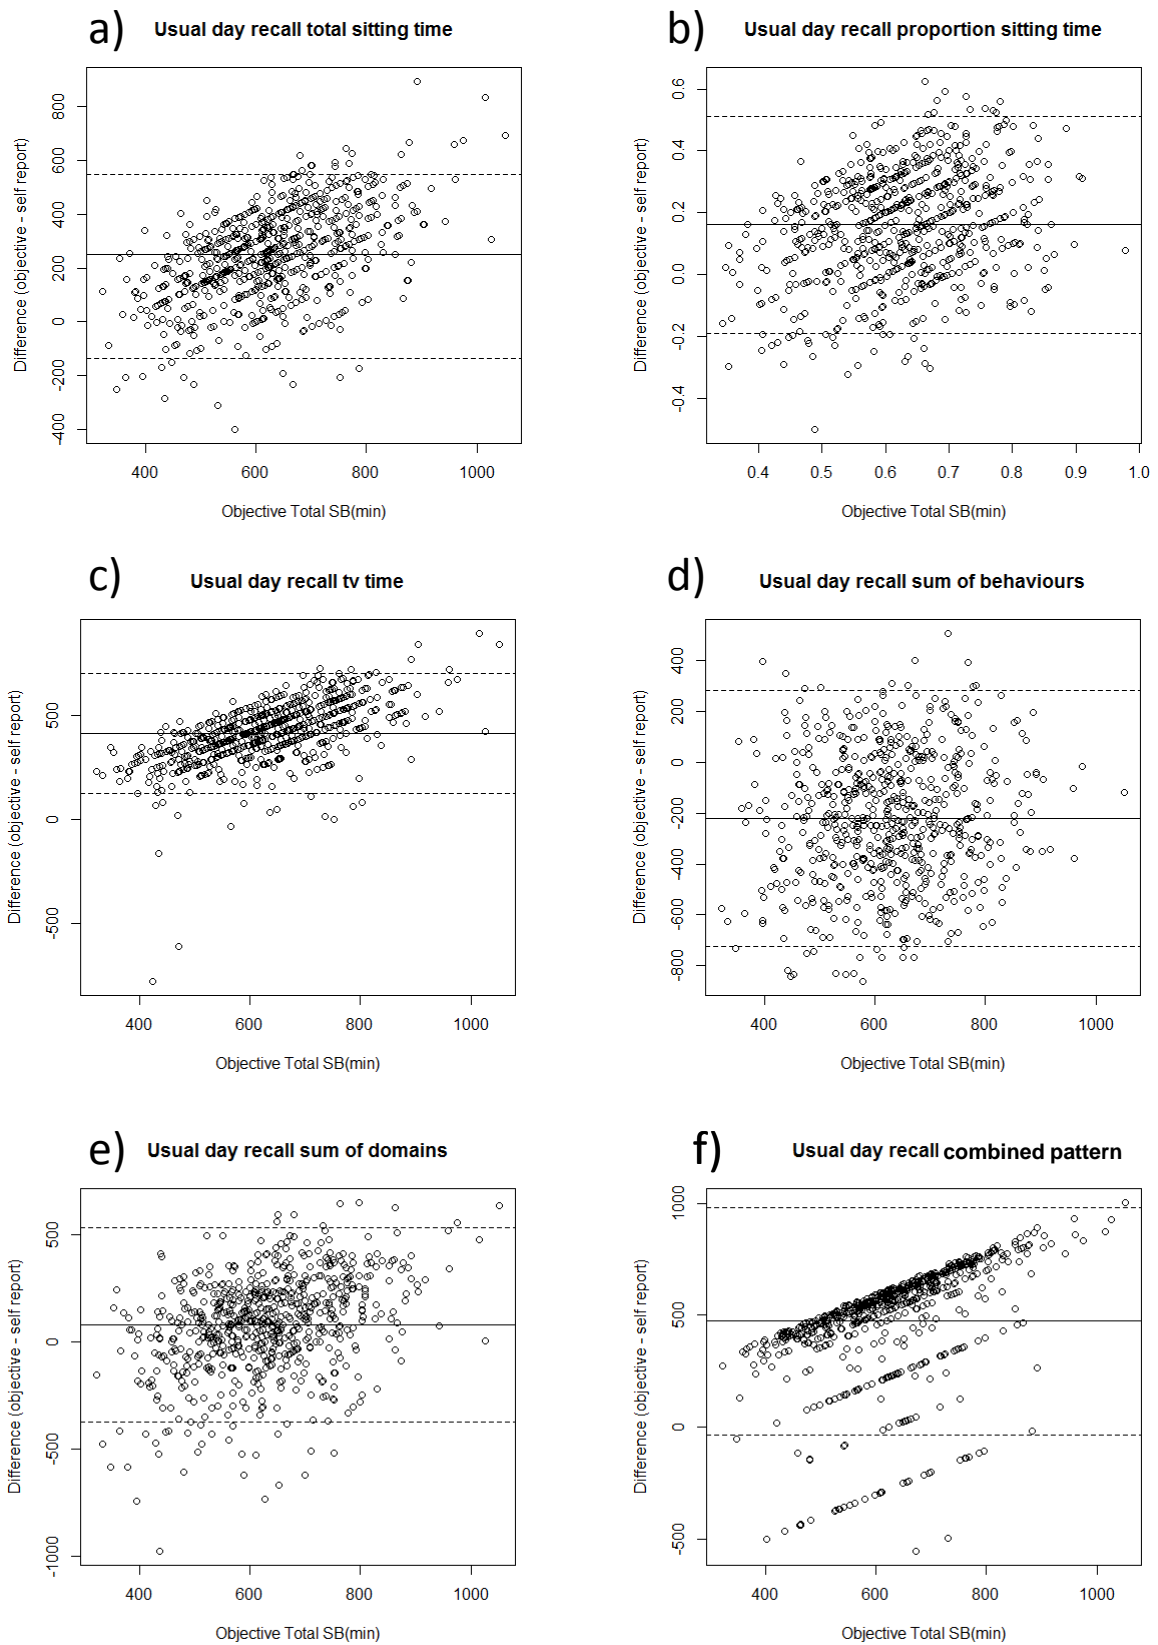

Figure S3: Bland and Altman plots for unanchored recall period (Usual day) self-reported tools of sedentary time
